# Supplementary material for: Genome-Wide Identification and Characterization of Members of the ACS Gene Family in Cucurbita maxima and Their Transcriptional Responses to the Specific Treatments
Source: MDPI journal article supplement (doi:10.3390/ijms23158476), 2022-07-30
Supplement: s1 [file s1]

|          |                                                                                                          |     |
|----------|----------------------------------------------------------------------------------------------------------|-----|
| CmaACS1  | MTETRRFFNRNRSKSNKEEPTTSDCGGTANFVI VPLQCI VCGSGCVVLGSLI PCVLFYFL(LYLKRNRS)ETEDPPSPFEVESP CNSSSPSSNCSVLESP | 100 |
| CmaACS2  | .....                                                                                                    | 0   |
| CmaACS3  | .....                                                                                                    | 0   |
| CmaACS4  | .....                                                                                                    | 0   |
| CmaACS5  | .....                                                                                                    | 0   |
| CmaACS6  | .....                                                                                                    | 0   |
| CmaACS7  | .....                                                                                                    | 0   |
| CmaACS8  | .....                                                                                                    | 0   |
| CmaACS9  | MT(NRL)PTFRNSKPIEEFE SATS CCGRAANRVVPLQSVV(CGRGCVVLGSLI PCVLFYFL(LYLKRNRS)DTRD)SPSPDAESS CNSSLSNCLVLETV  | 100 |
| CmaACS10 | .....                                                                                                    | 0   |
| CmaACS11 | .....                                                                                                    | M   |
| CmaACS12 | .....                                                                                                    | 0   |
| CmaACS13 | .....                                                                                                    | 0   |
| I        |                                                                                                          |     |
| CmaACS1  | LPRTLRTFLSSRSNGPVCSCRANSI AKVCESSIFVYAKKFEEDPFLELNPITGII QLSIFENKLSSTLVCLVLEFNGRDAILCGGNENELSVACTVS      | 200 |
| CmaACS2  | .....                                                                                                    | 82  |
| CmaACS3  | .....                                                                                                    | 90  |
| CmaACS4  | .....                                                                                                    | 82  |
| CmaACS5  | .....                                                                                                    | 82  |
| CmaACS6  | .....                                                                                                    | 82  |
| CmaACS7  | .....                                                                                                    | 90  |
| CmaACS8  | .....                                                                                                    | 86  |
| CmaACS9  | LPRTLRTFLSSRSNGPVCSCRANSI AKVCESSIFVYAKKFEEDPFLELNPITGII QLSVAKNLSSTLVCLVLEFNGRDAILCGGNENELSVACTVS       | 200 |
| CmaACS10 | .....                                                                                                    | 91  |
| CmaACS11 | FTLNSCI PHKCE (ET)SAGLSTKATCNSEGGCLSSYHLCVVEYKKNPYEIRPNQII QGLAENCLCFDLVEFVLEENPDAAFC. KRDCKSI FRELALF   | 99  |
| CmaACS12 | .....                                                                                                    | 92  |
| CmaACS13 | .....                                                                                                    | 92  |
| II       |                                                                                                          |     |
| CmaACS1  | QPSIDGLADKLAVASFSCAVCNVSII PSCLVFTNVCSSAII TLSFCIDAGHFAFLPTPY. ...                                       | 295 |
| CmaACS2  | QDVHGIPAFKKALVF...EIRGNKVTEANNIVLTGAT SANITLAFCLAE GAFILPTPY. ...                                        | 177 |
| CmaACS3  | QDVHGIPFENAVANF...CKVRCDRVKDPDRVVASG GATCAHIVAFCLAE GAFILPTPY. ...                                       | 185 |
| CmaACS4  | QDVHGIPAFKKALVF...SEIRGNRVINPDEHIVLTGAT SANITLAFCLAE GAFILPTPY. ...                                      | 177 |
| CmaACS5  | QDVHGIPAFKKALVF...EIRGNKVTDVNNIVLTGAT SANITLAFCLAE GAFILPTPY. ...                                        | 177 |
| CmaACS6  | QDVHGIPAFKKALVF...EIRGNKVTEANNIVLTGAT SANITLAFCLAE GAFILPTPY. ...                                        | 177 |
| CmaACS7  | QDVHGILSFRITACF...EIRGGRARDPNRFVLTGAT AANLITLILANGLILPTPY. ...                                           | 185 |
| CmaACS8  | QDVHGILSFRITACF...EIRGGRARDPNRFVLTGAT AANLITLILANGLILPTPY. ...                                           | 181 |
| CmaACS9  | QPSIDGLADKLAVASFSCAVCNVSII PSCLVFTNVCSSAII TLSFCIDAGHFAFLPTPY. ...                                       | 295 |
| CmaACS10 | QDVHGIPCFRNVANF...AKVRGNRVCDPDRVVASG GATCAHIVAFCLAE GAFILPTPY. ...                                       | 186 |
| CmaACS11 | QDVHGIPAFKKALVF...SEIRGNKVTDVNNIVLTGAT SANITLAFCLAE GAFILPTPY. ...                                       | 194 |
| CmaACS12 | QDVHGILLEFCALASF...EKVRGGRVNDPSRIVAGCGATCSSITVI FCLADLGAFLSI FLENSTNSLSKFD                               | 192 |
| CmaACS13 | QDVHGILLEFCALASF...EKVRGGRVNDPSRIVAGCGATCSSITVI FCLADLGAFLSI FLENSTNSLSKFD                               | 187 |
| III      |                                                                                                          |     |
| CmaACS1  | LDFAFEFCRSRGLKVRGIIISNPSIPGNCLEFETIKLLHARDKNIIISNII FVCGSTVCSFEFVSMAEMDLESD. ...                         | 391 |
| CmaACS2  | IEQVHVEFCARNLRKGVLTINPSPIGTTASRHEILDLVFEITSRGIIISNII FVCGSTVCFPGVSMAEVLRRSSSCIEFVVRKRVHVSLSKLGIP         | 277 |
| CmaACS3  | IEFAAEKCESNIKIKQLIINPSPIGTYDRCTIETAVAFINCKRGIIVCIEIAATVETEPGII SI SEVIENDTECD. ...                       | 282 |
| CmaACS4  | LLFAVCSCSRDLKVRGVLINPSPIGTTITTTCEINLLLGIAASKNIIISNII FVCGSTVFNPGVSVAEILNCSYKHNDI RCQVHVSLSKLGIP          | 277 |
| CmaACS5  | MEFAERFELNLRKGVLTINPSPIGTTASRBEILNVFEITSRGIIISNII FVCGSTVETPKRTIMDDLKES. ...                             | 273 |
| CmaACS6  | IEQVHVEFCARNLRKGVLTINPSPIGTTANRIEILNVFEITSRGIIISNII FVCGSTVCFPGVSMAEVLRRSSSCIEFVVRKRVHVSLSKLGIP          | 277 |
| CmaACS7  | IEAANNIAI ANLNRKGVLTINPSPIGATI CRSTIEEILDFVTRKNIIISNII FVCGSVFSSAEIISVAEVLASRGYKL. ...                   | 282 |
| CmaACS8  | IEAANNIAI ANLNRKGVLTINPSPIGLTI CRSTIEEVLFDVTRKNIIISNII FVCGSVFSSAEIISVAGVLESRGKN. ...                    | 278 |
| CmaACS9  | LDFAFEFCARNLRKGVLTINPSIPGNCLEFETIKLLHARDKNIIISNII FVCGSTVCSFEFVSMAEMDLESD. ...                           | 391 |
| CmaACS10 | MEFAVEFEKSGIKVQLIINPSPIGTYVYDKKITEITAVFINKNIIISNII FVCGSTVCFPGVSVAEILNCSYKHNDI RCQVHVSLSKLGIP            | 283 |
| CmaACS11 | LLFAVCSARNLRKGVLTINPSPIGTTITTTCEINLLLGIAASKNIIISNII FVCGSTVCFPGVSVAEILNCSYKHNDI RCQVHVSLSKLGIP           | 294 |
| CmaACS12 | IEFAVKKCEANI KVRGIIINPSPIGTYDRDITKTLVTVNCHDIIICDII SATVFKAPTII SIACI VEEFECK. ...                        | 289 |
| CmaACS13 | IEFAVKKCEANI KVRGIIINPSPIGTYDRDITKTLVTVNCHDIIICDII SATVFKAPTII SIACI VEEFECK. ...                        | 284 |
| IV       |                                                                                                          |     |
| CmaACS1  | CFRVAATVSNENILAAAGKLARSSTSAITGNLSSMSHACIKFI CINKRKLCEANSKFVAGHLELII KYAFSSNGPFCVADACNITR. SYSSEK         | 489 |
| CmaACS2  | CFRVAATVSNDDAVVAATRASSGLVSSCTGYLLSAM SIKKTIIRNYI SENCKRLKCFCKMLVSCAKQICLCLNSNA CLFQVADARHLK. SDFTES      | 375 |
| CmaACS3  | CFRVGITVSNDDAVNCAARAASSGLVSSCTGHLLASMSIDDEIASEFLVGSARKLAARHNRITRQACQICYLFGSGCLFLMDLRHLK. EKTLEA          | 380 |
| CmaACS4  | CFRVAATVSNDDVVAATRASSGLVSSCTGYLLSAM SIKKTIIRNYI SENCKRLKCFCKMLVSCAKQICKEFGNA CLFQVADARHLK. ANTFFS        | 375 |
| CmaACS5  | CFRVGITVSNPKVVAATRASSGLVSSCTGYLLSAM SIKKTIIRNYI SENCKRLKCFCKMLVSCAKQICLCLNSNA CLFQVADARHLK. SCSTFE       | 371 |
| CmaACS6  | CFRVAATVSNDDVVAATRASSGLVSSCTGYLLSAM SIKKTIIRNYI SENCKRLKCFCKMLVSCAKQICLCLNSNA CLFQVADARHLK. SDFTES       | 375 |
| CmaACS7  | CFRVGITVSNDDVVTARRASSITLISCTGRFLASMSNRKCIIRKRI KANRDLKRYEYIIEQRTAQICLCLNSNA CLFQVADARHLK. DCKKTTNT       | 382 |
| CmaACS8  | CFRVGITVSNDDVVTARRASSITLISCTGRFLASMSNRKCIIRKRI KANRDLKRYEYIIEQRTAQICLCLNSNA CLFQVADARHLK. KNPTFRE        | 377 |
| CmaACS9  | CFRVAATVSNENILAAAGKLARSSTSAITGNLSSMSIKKCIIRCFRI RIRREELCEANRRFAAGHLELII KCIENSGCFQVADASNTI. G. SYSEKA    | 489 |
| CmaACS10 | CFRVGITVSNDDAVCAARAASSGLVSSCTGYLLASMSIDDAVDRFLAGSAEKLATRRNRITKQACQICYLEGSGCLFLMDLRHLK. EKTLEA            | 381 |
| CmaACS11 | CFRVGITVSNDDVVAATRASSGLVSSCTGYLLSAM SIKKTIIRNYI SENCKRLKCFCKMLVSCAKQICKEFGNA CLFQVADARHLK. ANTFFS        | 392 |
| CmaACS12 | CFRVGITVSNDDVVTARRASSITLISCTGHLLAAMSTIEIDVDFLANSKRLCEHARFTKELDEKQITCLNSNA CLFQVADARHLK. DCTFRA           | 387 |
| CmaACS13 | CFRVGITVSNDDVVTARRASSITLISCTGHLLAAMSTIEIDVDFLANSKRLCEHARFTKELDEKQITCLNSNA CLFQVADARHLK. DCTFRA           | 382 |
| V        |                                                                                                          |     |
| CmaACS1  | EVLEVDKLLDI GKVEVIFGSCCNCIEFGVFGCHITTLIDEEIPI VMIRRTISEACKSYT. ...                                       | 549 |
| CmaACS2  | EVLEVDKLLDI GKVEVIFGSCCNCIEFGVFGCHITTLIDEEIPI VMIRRTISEACKSYT. ...                                       | 473 |
| CmaACS3  | EVLEVDKLLDI GKVEVIFGSCCNCIEFGVFGCHITTLIDEEIPI VMIRRTISEACKSYT. ...                                       | 473 |
| CmaACS4  | EVLEVDKLLDI GKVEVIFGSCCNCIEFGVFGCHITTLIDEEIPI VMIRRTISEACKSYT. ...                                       | 468 |
| CmaACS5  | EVLEVDKLLDI GKVEVIFGSCCNCIEFGVFGCHITTLIDEEIPI VMIRRTISEACKSYT. ...                                       | 442 |
| CmaACS6  | EVLEVDKLLDI GKVEVIFGSCCNCIEFGVFGCHITTLIDEEIPI VMIRRTISEACKSYT. ...                                       | 470 |
| CmaACS7  | EVLEVDKLLDI GKVEVIFGSCCNCIEFGVFGCHITTLIDEEIPI VMIRRTISEACKSYT. ...                                       | 445 |
| CmaACS8  | EVLEVDKLLDI GKVEVIFGSCCNCIEFGVFGCHITTLIDEEIPI VMIRRTISEACKSYT. ...                                       | 441 |
| CmaACS9  | EVLEVDKLLDI GKVEVIFGSCCNCIEFGVFGCHITTLIDEEIPI VMIRRTISEACKSYT. ...                                       | 549 |
| CmaACS10 | EVLEVDKLLDI GKVEVIFGSCCNCIEFGVFGCHITTLIDEEIPI VMIRRTISEACKSYT. ...                                       | 473 |
| CmaACS11 | EVLEVDKLLDI GKVEVIFGSCCNCIEFGVFGCHITTLIDEEIPI VMIRRTISEACKSYT. ...                                       | 492 |
| CmaACS12 | EVLEVDKLLDI GKVEVIFGSCCNCIEFGVFGCHITTLIDEEIPI VMIRRTISEACKSYT. ...                                       | 464 |
| CmaACS13 | EVLEVDKLLDI GKVEVIFGSCCNCIEFGVFGCHITTLIDEEIPI VMIRRTISEACKSYT. ...                                       | 482 |
| VI       |                                                                                                          |     |
| CmaACS1  | EVLEVDKLLDI GKVEVIFGSCCNCIEFGVFGCHITTLIDEEIPI VMIRRTISEACKSYT. ...                                       | 549 |
| CmaACS2  | EVLEVDKLLDI GKVEVIFGSCCNCIEFGVFGCHITTLIDEEIPI VMIRRTISEACKSYT. ...                                       | 473 |
| CmaACS3  | EVLEVDKLLDI GKVEVIFGSCCNCIEFGVFGCHITTLIDEEIPI VMIRRTISEACKSYT. ...                                       | 473 |
| CmaACS4  | EVLEVDKLLDI GKVEVIFGSCCNCIEFGVFGCHITTLIDEEIPI VMIRRTISEACKSYT. ...                                       | 468 |
| CmaACS5  | EVLEVDKLLDI GKVEVIFGSCCNCIEFGVFGCHITTLIDEEIPI VMIRRTISEACKSYT. ...                                       | 442 |
| CmaACS6  | EVLEVDKLLDI GKVEVIFGSCCNCIEFGVFGCHITTLIDEEIPI VMIRRTISEACKSYT. ...                                       | 470 |
| CmaACS7  | EVLEVDKLLDI GKVEVIFGSCCNCIEFGVFGCHITTLIDEEIPI VMIRRTISEACKSYT. ...                                       | 445 |
| CmaACS8  | EVLEVDKLLDI GKVEVIFGSCCNCIEFGVFGCHITTLIDEEIPI VMIRRTISEACKSYT. ...                                       | 441 |
| CmaACS9  | EVLEVDKLLDI GKVEVIFGSCCNCIEFGVFGCHITTLIDEEIPI VMIRRTISEACKSYT. ...                                       | 549 |
| CmaACS10 | EVLEVDKLLDI GKVEVIFGSCCNCIEFGVFGCHITTLIDEEIPI VMIRRTISEACKSYT. ...                                       | 473 |
| CmaACS11 | EVLEVDKLLDI GKVEVIFGSCCNCIEFGVFGCHITTLIDEEIPI VMIRRTISEACKSYT. ...                                       | 492 |
| CmaACS12 | EVLEVDKLLDI GKVEVIFGSCCNCIEFGVFGCHITTLIDEEIPI VMIRRTISEACKSYT. ...                                       | 464 |
| CmaACS13 | EVLEVDKLLDI GKVEVIFGSCCNCIEFGVFGCHITTLIDEEIPI VMIRRTISEACKSYT. ...                                       | 482 |
| VII      |                                                                                                          |     |
| CmaACS1  | LP(PS)MLRAT                                                                                              | 549 |
| CmaACS2  | LP(PS)MLRAT                                                                                              | 478 |
| CmaACS3  | LP(PS)MLRAT                                                                                              | 483 |
| CmaACS4  | LP(PS)MLRAT                                                                                              | 469 |
| CmaACS5  | LP(PS)MLRAT                                                                                              | 442 |
| CmaACS6  | LP(PS)MLRAT                                                                                              | 475 |
| CmaACS7  | LP(PS)MLRAT                                                                                              | 445 |
| CmaACS8  | LP(PS)MLRAT                                                                                              | 441 |
| CmaACS9  | LP(PS)MLRAT                                                                                              | 549 |
| CmaACS10 | LP(PS)MLRAT                                                                                              | 483 |
| CmaACS11 | LP(PS)MLRAT                                                                                              | 496 |
| CmaACS12 | LP(PS)MLRAT                                                                                              | 464 |
| CmaACS13 | LP(PS)MLRAT                                                                                              | 492 |

Figure S1. Amino acid sequence alignment of *CmaACS* genes. The conserved glutamate residue (E) marked with an arrowhead is involved in substrate specificity. Ser residues implicated in calcium-dependent protein kinase (CDPK) and mitogen-activated protein kinase (MPK6) phosphorylation are marked by asterisks and a black dot, respectively. The seven highly conserved regions (I–VII) among all ACC synthases are underlined.
