# Supplementary material for: Genome-Wide Identification and Characterization of Members of the ACS Gene Family in Cucurbita maxima and Their Transcriptional Responses to the Specific Treatments
Source: Int J Mol Sci. 2022 Jul 30;23(15):8476. doi: 10.3390/ijms23158476 (PMC9369044; doi:10.3390/ijms23158476)
Supplement: Supplementary file 1 [file ijms-23-08476-s001.zip › Supplementary Tables .xlsx]

## Sheet: TableS1
Table. S1 qRT-PCR Primer for ACS gene in Cucurbita maxima
Gene	Gene accession number	Primer sequence
CmaACS1	CmaCh02G015170.1	F：ACAGCGACGGCGGAGGG
		R：GAGGGTCCTCGGTTGGCTCG
CmaACS2	CmaCh03G008840.1	F：AAGACAAAAGATGCTGGTATCTGGT
		R：ACTGAGCGTTTGGAGAAGCG
CmaACS3	CmaCh04G007260.1	F：ATGCAAACAACTTACTCTCAAAACT
		R：ACTCATCCAGTCCTTCCACAGA.
CmaACS4	CmaCh04G008430.1	F：ATGGCTTCAGAATTACAGAGTCTGC
		R：AGAATTTCCATGACGCTAACGAAG
CmaACS5	CmaCh05G001180.1	F：CGGGTTCAGAATCACAGCAG
		R：TGGATTCCTTTGGCTTTGGC
CmaACS6	CmaCh07G006250.1	F：GGATGGGAGGCTTATGAAAACAATC
		R：TAAGAGTCTCATTTGCTGACGTGGC
CmaACS7	CmaCh10G007020.1	F：AGCAAAACTCTGATGTTCTTCAAGC
		R：TGGATCAAATCTAGCTCDTCCG
CmaACS8	CmaCh11G006760.1	F: CTGAAATTGCTATGTCGGAAAC
		R: ATTTGGATAATCCCAGAAGG
CmaACS9	CmaCh15G011790.1	F：GCCACAAGCTGTGGTGGAAGAG
		R：GCGAGTCCCGGGTCTGGTC
CmaACS10	CmaCh16G005820.1	F: ATTTGTAGCGTTGAAGGAGTT
		R: CGCATTTCTGAACTGTGGC
CmaACS11	CmaCh16G007300.1	F: TCTACTTCAAACAACCTCGACAC
		R: CTATCGATCACGTGATTCGCTAC
CmaACS12	CmaCh17G004550.1	F: CTTTCAAGATTATCGTGGTTTGCT
		R: GTCGAATTTCACCCTCCCA
CmaACS13	CmaCh17G004560.1	F: GACAAGAAGGAAGACAATACCGT
		R: TAACGGCGAGTGAGGCGA

## Sheet: Table S2
Table S2. The nucleotide/amino acid identities of CmaACS genes. The identity among nucleotide sequences and amino acid sequences of CmaACSs are given at upper right and bottom left of the diagonal, respectively.
CmaACS	CmaACS1	CmaACS2	CmaACS3	CmaACS4	CmaACS5	CmaACS6	CmaACS7	CmaACS8	CmaACS9	CmaACS10	CmaACS11	CmaACS12	CmaACS13
CmaACS1	100
CmaACS2	29.53	100
CmaACS3	27.61	46.61	100
CmaACS4	30.66	73.22	48.05	100
CmaACS5	28.75	64.44	45.57	62.26	100
CmaACS6	30.02	90.79	47.43	72.84	64.84	100
CmaACS7	31.53	51.93	47.65	51.45	51.32	52.87	100
CmaACS8	31.35	51.95	45.98	51.88	50.66	52.07	78.92	100
CmaACS9	82.51	30.37	28.45	31.01	29.29	30.69	31.71	30.81	100
CmaACS10	27.82	48.05	89.69	48.46	47.42	47.43	47.95	47.22	29.51	100
CmaACS11	29.65	68.01	48.1	81.85	59.07	67.4	48.9	48.69	30.99	48.29	100
CmaACS12	26.57	45.44	57.23	46.49	46.55	46.94	48.18	49.03	26.57	56.12	45.11	100
CmaACS13	26.46	47.58	62.47	47.59	45.44	48.79	47.18	47.17	26.79	61.05	47.62	85.94	100

## Sheet: Table S3
Table.S3 Consensus sequence map of identified motifs.
Motif	Width	Consensus Sequence	Function	E-value
1	98	PTPYYPGFDRDLKWRTGVEIVPIHCSSSNNFQITKAALEE	Aminotransferase I and II	6.98e-72
		AYKKAQERNJKVKGVLITNPSNPLGTTIDRDTLELLLDFI
		TSKNIHLISDEIY SGTVF
2	116	REECDKDRVHIVYSLSKDLGLPGFRVGAIYSYNDVVVAA	Aminotransferase I and II	1.35e-75
		ARKMSSFGLVSSQTQYLLSAMLSDEKFVDKYIAENRKRL
		KKRHRMFVKGLQKAG IKCLKGNAGLFCWMDMRHLLKSN
3	65	LLSKKATSBSHGZDSSYFLGWKAYDEBPFHETDNPTGIIQM	Aminotransferase I and II	8e-40
		GLAENQLSFDLVEEWLEENPDAAI
4	41	KLNVSPGSSCHCSEPGWFRVCFANMSENTLDIAMRRJKSFV	Aminotransferase I and II	3.19e-27
5	57	FQDYHGLPAFKKALAEFMAEIRGNRVKFDPSRIVLTAGATS	Aminotransferase I and II	2.51e-42
		ANETLMFCLAEPGDAF
6	15	FEAEMELWRKILNEV	Aminotransferase I and II	0.000238
7	113	MTQNRFFRNRNSKPDEEGEPATSCGGGAAMRVIVPLQGIV	Unknown	N/A
		QGRGGVVLGSLIPCVLFYFLQLYLKRNRSEPTEDPPPSPEV
		DSPGNSSLPSSN QLVELSPLPRTLSRTFLSPR
8	11	PGFVSIAEVJE	Unknown	N/A
9	41	KKQKFCWRQSSLELRLSSRRLEDIMSPHSPLPQSPMLRATT	Unknown	N/A
10	35	STTASSQTNNDTKNCKNTKKKIFTKWVFRLSVQDR	Unknown	N/A
